# Supplementary material
Source: MDPI journal article supplement (https://www.mdpi.com/2073-8994/13/8/1532)
Supplement: s1 [file s1]

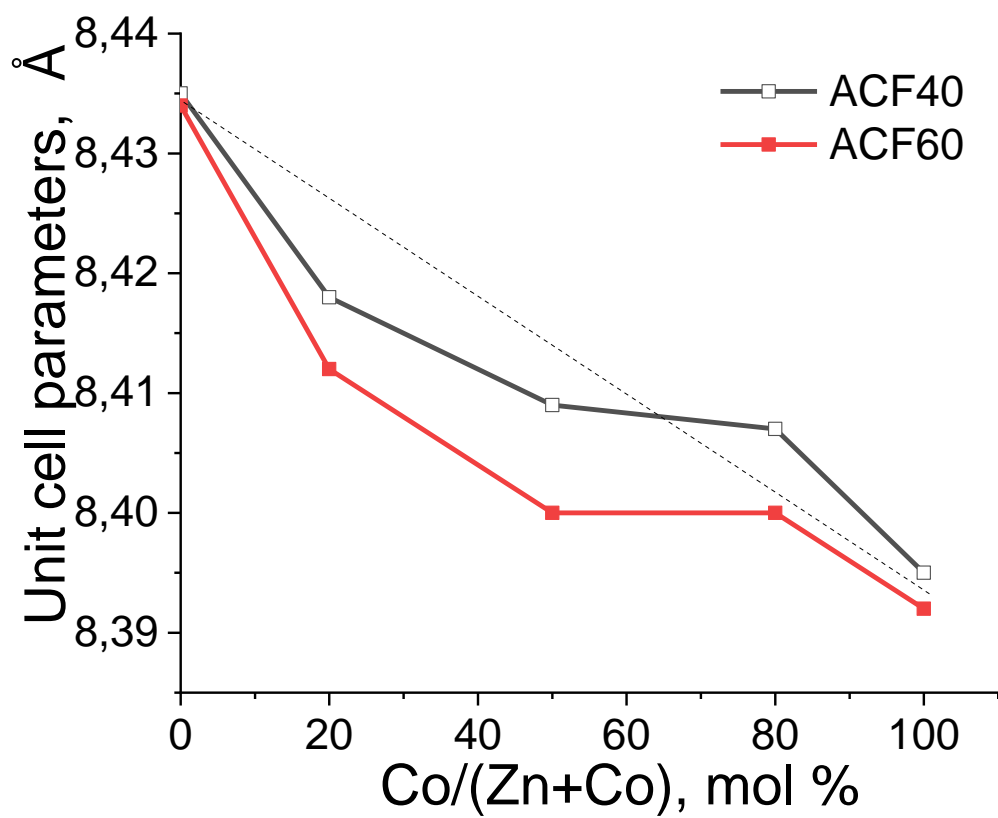

**Figure S4.** Changes in the unit cell parameters of spinel phase for the ACF40 and ACF60 modified carbon foams.
