# Supplementary material
Source: MDPI journal article supplement (https://www.mdpi.com/2073-8994/13/8/1532)
Supplement: s1 [file s1]

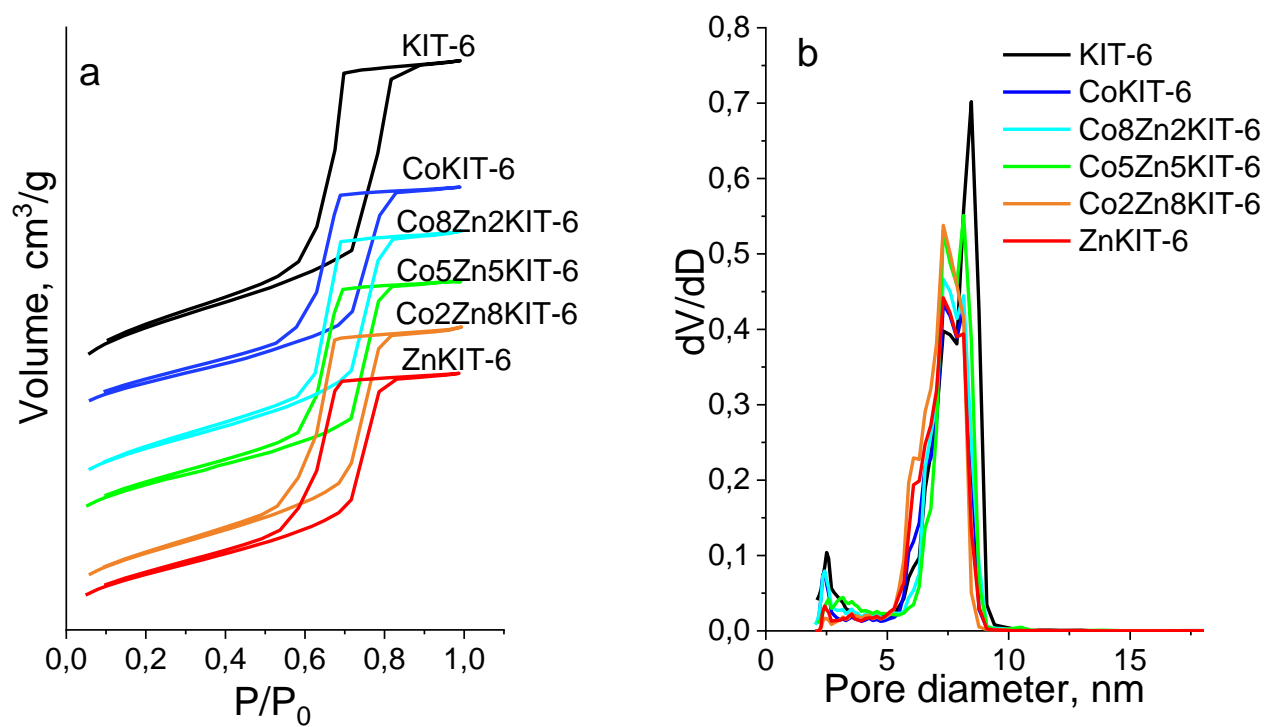

**Figure S2.** Nitrogen physisorption isotherms (shifted by y axis) (a) and pore size distribution (b) for pristine and modified mesoporous KIT-6 silica.
