# Supplementary material
Source: MDPI journal article supplement (https://www.mdpi.com/2073-8994/13/8/1532)
Supplement: s1 [file s1]

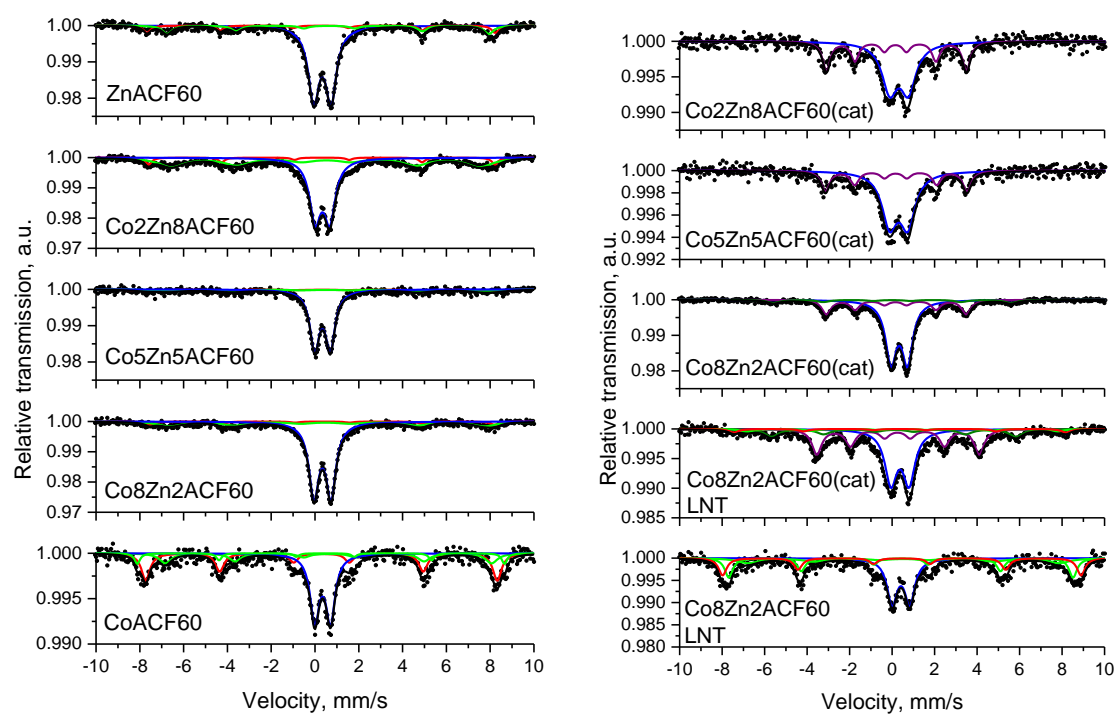

**Figure S6.** Room temperature Moessbauer spectra of ACF60 supported samples before (left) and after (cat) the catalytic test (right) and selected Moessbauer spectra at liquid nitrogen temperature (LNT).
