# Supplementary material
Source: MDPI journal article supplement (https://www.mdpi.com/2073-8994/13/8/1532)
Supplement: s1 [file s1]

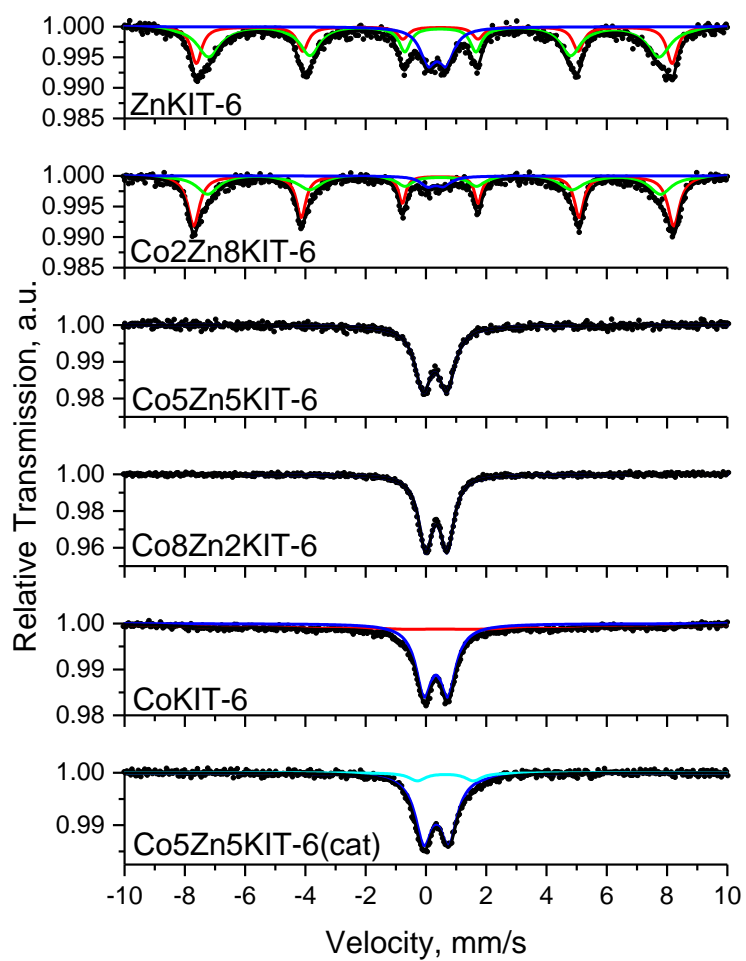

**Figure S7.** Room temperature Mössbauer spectra of the initial KIT-6 based materials and selected spectrum after the catalytic test (cat).
