# Supplementary material
Source: MDPI journal article supplement (https://www.mdpi.com/2073-8994/13/8/1532)

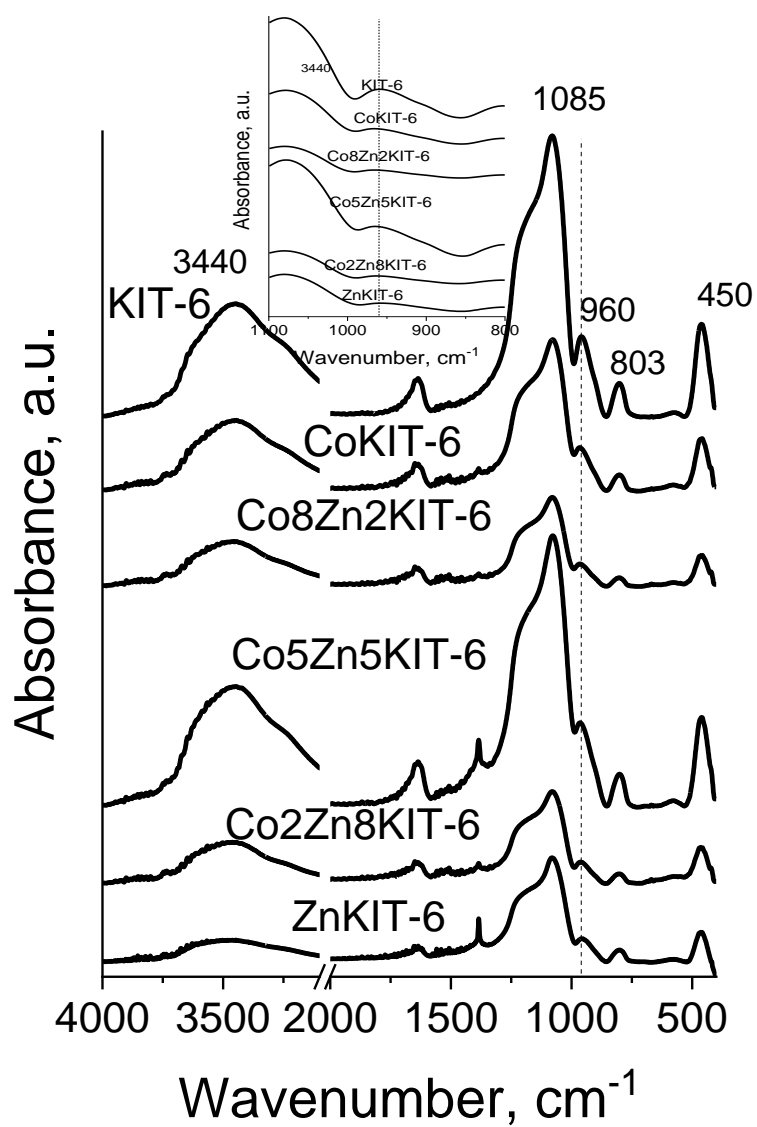

**Figure S3.** FTIR spectra of parent and modified mesoporous KIT-6 silica.

Supplement: s1 [file s1]

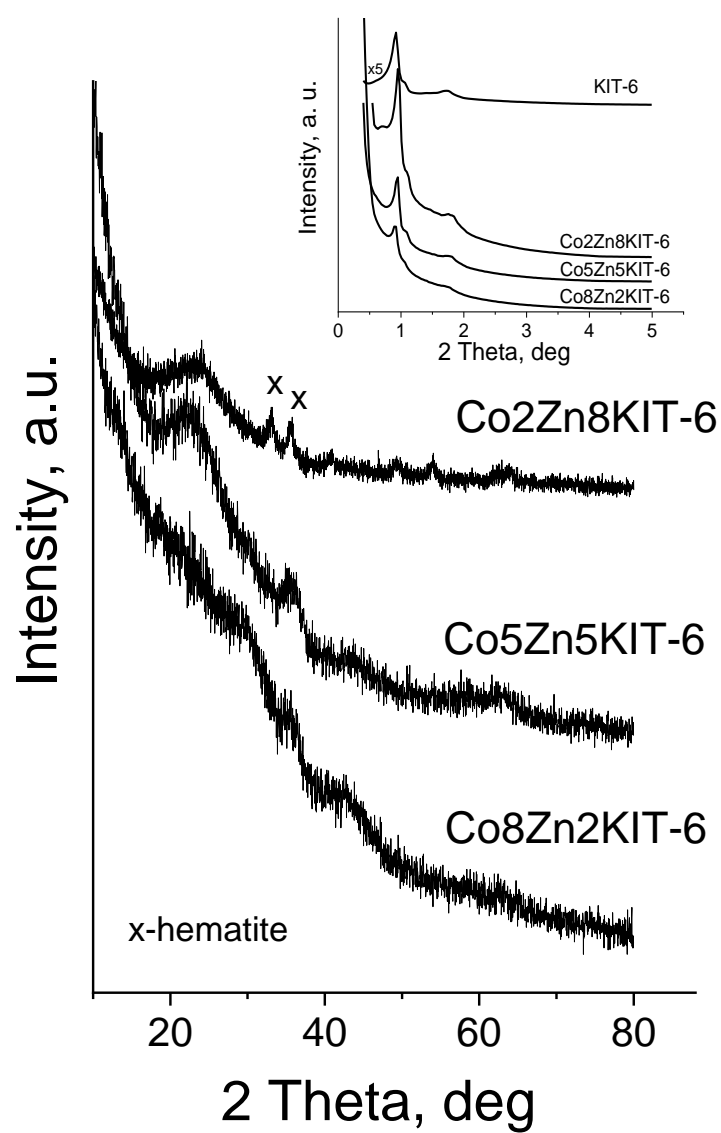

**Figure S1.** XRD patterns of selected KIT-6 modifications. Inset: low angle XRD patterns.

Supplement: s1 [file s1]
